# Supplementary material for: Differential Expression Profile of Salivary oncomiRNAs among Smokeless Tobacco Users
Source: PubMed Central journal article supplement (PMC10756836; doi:10.1055/s-0043-1761191), 2023-02-22
Supplement: 10-1055-s-0043-1761191-s2282331.pdf [file 10-1055-s-0043-1761191-s2282331.pdf]

**Supplementary Material Table S1** Differential expression levels of miR-21, miR-155, miR-146, and miR-199 in head and neck cancers. Source: <https://www.biosino.org/dbDEMC/index>

| Cancer type          | Design                        | Sample case         | miRID           | logFC       | AveExpr   | t         | p-Value  | B         | No of samples | Source |
|----------------------|-------------------------------|---------------------|-----------------|-------------|-----------|-----------|----------|-----------|---------------|--------|
| Head and neck cancer | Cancer vs. normal             | HNSC                | hsa-miR-21-5p   | 1.567439198 | 17.95079  | 17.57629  | 1.58E-55 | 115.5597  | 564           | TCGA   |
| Head and neck cancer | Cancer vs. normal             | HNSC                | hsa-miR-155-3p  | 0.503668701 | -0.775638 | 3.513393  | 0.000478 | -1.385718 | 564           | TCGA   |
| Head and neck cancer | High-grade vs. low-grade      | HNSC stage 3        | hsa-miR-146a-3p | 3.023390464 | -1.486151 | 9.824656  | 3.90E-21 | 37.23433  | 564           | TCGA   |
| Head and neck cancer | Poor outcome vs. good outcome | Short time survival | hsa-miR-199a-3p | -2.69658317 | 9.03946   | -6.889757 | 3.09E-08 | 8.826223  | 40            | GEO    |

Abbreviation: SC, squamous cancer.
